# Supplementary material for: Novel Molecular Beacon Probe-Based Real-Time RT-PCR Assay for Diagnosis of Crimean-Congo Hemorrhagic Fever Encountered in India
Source: Hindawi journal article supplement (doi:10.1155/2014/496219), 2014-01-01
Supplement: f1 [file 496219.f1.pdf]

## Supplementary material

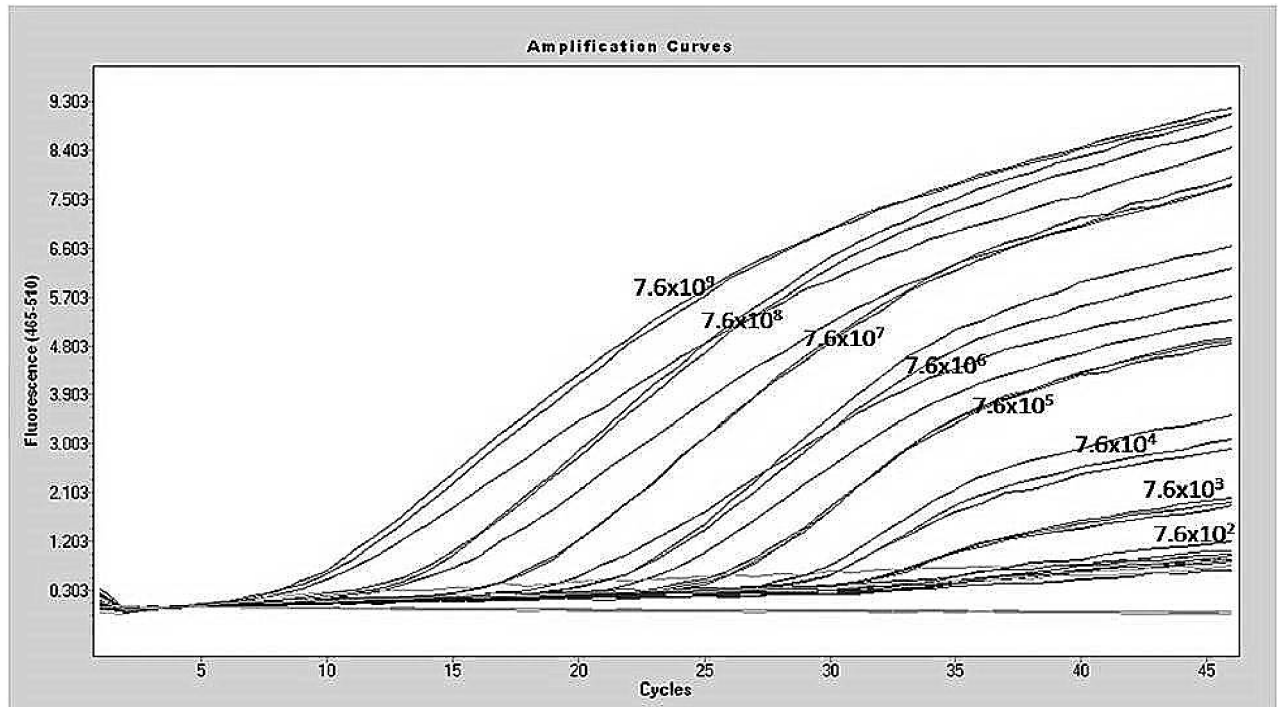

FIGURE 3: Amplification curves of 10-fold serial dilution of CCHFV IVT-RNA ranging from copy no.  $7.6 \times 10^9$  to 7.6 using TaqMan rRT-PCR. X-axis represents the cycle no. and Y-axis represents the fluorescence acquired at 465-510 nm. The curve shows logarithmic amplification of IVT-RNA dilutions. The numbers on the curves represents the copies of CCHFV IVT-RNA.

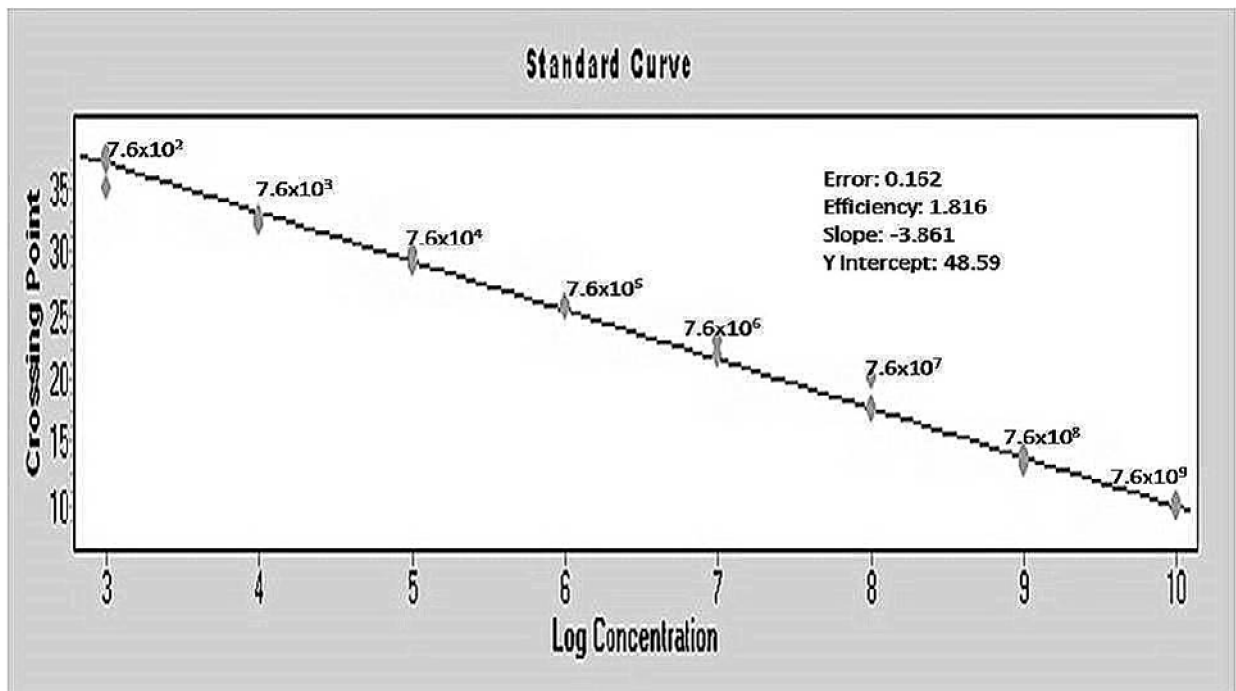

FIGURE 4: Standard curve for TaqMan rRT-PCR. The assay was linear from  $7.6 \times 10^9$  to  $7.6 \times 10^2$ . X-axis represents the IVT-RNA copy number and Y-axis represents Cp value.
